# Supplementary material
Source: publisher figshare collection journal article supplement (https://asha.figshare.com/articles/dataset/_/25970008)
Supplement: Supplementary file 1 [file 1]

**Supplemental Material S2.** Full model results in the by-syllable and by-gender analysis in the ABX tasks.

For purposes of clarity, Tables 4 and 5 in the manuscript only listed significant predictors in the by-gender and by-syllable analysis of the ABX discrimination performance (for T1-T2 and T1-T4, respectively). Tables S1 and S2 below show the full models with all the predictors that were entered into the model.

**Table S2.1.** Full model results for the by-gender and by-syllable models on participants' accuracy in the ABX discrimination task for T1-T2.  $\alpha = .05$ .

| <b>The Model of Pre-test vs Post-test 1, T1-T2</b> |             |           |          |                 |
|----------------------------------------------------|-------------|-----------|----------|-----------------|
| <b>Variables</b>                                   | <b>Est.</b> | <b>SE</b> | <b>z</b> | <b>p</b>        |
| (Intercept)                                        | 2.668       | 0.12      | 22.288   | <b>&lt;.001</b> |
| Distribution                                       | 0.024       | 0.233     | 0.101    | 0.919           |
| Session                                            | 0.195       | 0.086     | 2.269    | <b>0.023</b>    |
| Gender                                             | -0.129      | 0.086     | -1.501   | 0.133           |
| Syllable                                           | 0.005       | 0.086     | 0.061    | 0.951           |
| Distribution*Session                               | 0.044       | 0.172     | 0.255    | 0.798           |
| Distribution*Gender                                | 0.063       | 0.172     | 0.365    | 0.715           |
| Session*Gender                                     | -0.008      | 0.172     | -0.046   | 0.963           |
| Distribution*Syllable                              | 0.048       | 0.171     | 0.282    | 0.778           |
| Session*Syllable                                   | 0.232       | 0.171     | 1.356    | 0.175           |
| Gender*Syllable                                    | 0.462       | 0.172     | 2.69     | <b>&lt;.01</b>  |
| Distribution*Session*Gender                        | -0.417      | 0.343     | -1.216   | 0.224           |
| Distribution*Session*Syllable                      | 0.054       | 0.343     | 0.156    | 0.876           |
| Distribution*Gender*Syllable                       | -0.16       | 0.343     | -0.467   | 0.641           |
| Session*Gender*Syllable                            | -0.089      | 0.343     | -0.26    | 0.795           |
| Distribution*Session*Gender*Syllable               | -0.386      | 0.686     | -0.563   | 0.573           |

| <b>The Model of Pre-test vs Post-test 2, T1-T2</b> |             |           |          |                 |
|----------------------------------------------------|-------------|-----------|----------|-----------------|
| <b>Variables</b>                                   | <b>Est.</b> | <b>SE</b> | <b>z</b> | <b>p</b>        |
| (Intercept)                                        | 2.668       | 0.12      | 22.288   | <b>&lt;.001</b> |
| Distribution                                       | 0.024       | 0.233     | 0.101    | 0.919           |
| Session                                            | 0.195       | 0.086     | 2.269    | <b>0.023</b>    |
| Gender                                             | -0.129      | 0.086     | -1.501   | 0.133           |
| Syllable                                           | 0.005       | 0.086     | 0.061    | 0.951           |
| Distribution*Session                               | 0.044       | 0.172     | 0.255    | 0.798           |
| Distribution*Gender                                | 0.063       | 0.172     | 0.365    | 0.715           |
| Session*Gender                                     | -0.008      | 0.172     | -0.046   | 0.963           |
| Distribution*Syllable                              | 0.048       | 0.171     | 0.282    | 0.778           |
| Session*Syllable                                   | 0.232       | 0.171     | 1.356    | 0.175           |
| Gender*Syllable                                    | 0.462       | 0.172     | 2.69     | <b>&lt;.01</b>  |
| Distribution*Session*Gender                        | -0.417      | 0.343     | -1.216   | 0.224           |
| Distribution*Session*Syllable                      | 0.054       | 0.343     | 0.156    | 0.876           |
| Distribution*Gender*Syllable                       | -0.16       | 0.343     | -0.467   | 0.641           |
| Session*Gender*Syllable                            | -0.089      | 0.343     | -0.26    | 0.795           |
| Distribution*Session*Gender*Syllable               | -0.386      | 0.686     | -0.563   | 0.573           |

**Table S2.2.** Full model results for the by-gender and by-syllable models on participants' accuracy in the ABX discrimination task for T1-T4.  $\alpha = .05$ .

| <b>The Model of Pre-test vs Post-test 1, T1-T4</b> |             |           |          |                 |
|----------------------------------------------------|-------------|-----------|----------|-----------------|
| <b>Variables</b>                                   | <b>Est.</b> | <b>SE</b> | <b>z</b> | <b>p</b>        |
| (Intercept)                                        | 1.587       | 0.095     | 16.757   | <b>&lt;.001</b> |
| Distribution                                       | -0.071      | 0.187     | -0.379   | 0.705           |
| Session                                            | 0.077       | 0.063     | 1.212    | 0.225           |
| Gender                                             | -0.048      | 0.063     | -0.765   | 0.444           |
| Syllable                                           | 0.624       | 0.063     | 9.844    | <b>&lt;.001</b> |
| Distribution*Session                               | -0.181      | 0.127     | -1.429   | 0.153           |
| Distribution*Gender                                | 0.06        | 0.127     | 0.473    | 0.636           |
| Session*Gender                                     | 0.065       | 0.127     | 0.51     | 0.61            |
| Distribution*Syllable                              | -0.027      | 0.127     | -0.209   | 0.834           |
| Session*Syllable                                   | -0.037      | 0.127     | -0.29    | 0.772           |
| Gender*Syllable                                    | 0.53        | 0.127     | 4.18     | <b>&lt;.001</b> |
| Distribution*Session*Gender                        | 0.026       | 0.253     | 0.104    | 0.917           |
| Distribution*Session*Syllable                      | -0.166      | 0.253     | -0.656   | 0.512           |
| Distribution*Gender*Syllable                       | -0.494      | 0.253     | -1.948   | 0.051           |
| Session*Gender*Syllable                            | 0.152       | 0.253     | 0.6      | 0.548           |
| Distribution*Session*Gender*Syllable               | -0.232      | 0.506     | -0.459   | 0.646           |

| <b>The Model of Pre-test vs Post-test 2, T1-T4</b> |             |           |          |                 |
|----------------------------------------------------|-------------|-----------|----------|-----------------|
| <b>Variables</b>                                   | <b>Est.</b> | <b>SE</b> | <b>z</b> | <b>p</b>        |
| (Intercept)                                        | 1.665       | 0.104     | 16.005   | <b>&lt;.001</b> |
| Distribution                                       | -0.166      | 0.207     | -0.799   | 0.425           |
| Session                                            | 0.181       | 0.064     | 2.806    | <b>&lt;.01</b>  |
| Gender                                             | 0.005       | 0.064     | 0.073    | 0.942           |
| Syllable                                           | 0.606       | 0.064     | 9.435    | <b>&lt;.001</b> |
| Distribution*Session                               | -0.265      | 0.129     | -2.059   | <b>0.039</b>    |
| Distribution*Gender                                | 0.002       | 0.128     | 0.019    | 0.985           |
| Session*Gender                                     | 0.172       | 0.128     | 1.345    | 0.179           |
| Distribution*Syllable                              | 0.014       | 0.128     | 0.113    | 0.91            |
| Session*Syllable                                   | -0.077      | 0.128     | -0.601   | 0.548           |
| Gender*Syllable                                    | 0.636       | 0.128     | 4.957    | <b>&lt;.001</b> |
| Distribution*Session*Gender                        | -0.1        | 0.256     | -0.391   | 0.696           |
| Distribution*Session*Syllable                      | -0.086      | 0.256     | -0.335   | 0.737           |
| Distribution*Gender*Syllable                       | -0.454      | 0.256     | -1.769   | 0.077           |
| Session*Gender*Syllable                            | 0.345       | 0.256     | 1.348    | 0.178           |
| Distribution*Session*Gender*Syllable               | -0.13       | 0.512     | -0.254   | 0.8             |
