# Supplementary material
Source: publisher figshare collection journal article supplement (https://asha.figshare.com/articles/dataset/_/25970008)
Supplement: Supplementary file 2 [file 1]

# **Supplemental Material S1.** Individual reaction time data in the ABX task.

Figure S1 shows the overall reaction time data in the ABX discrimination tasks, as well as individual data superimposed on the group means.

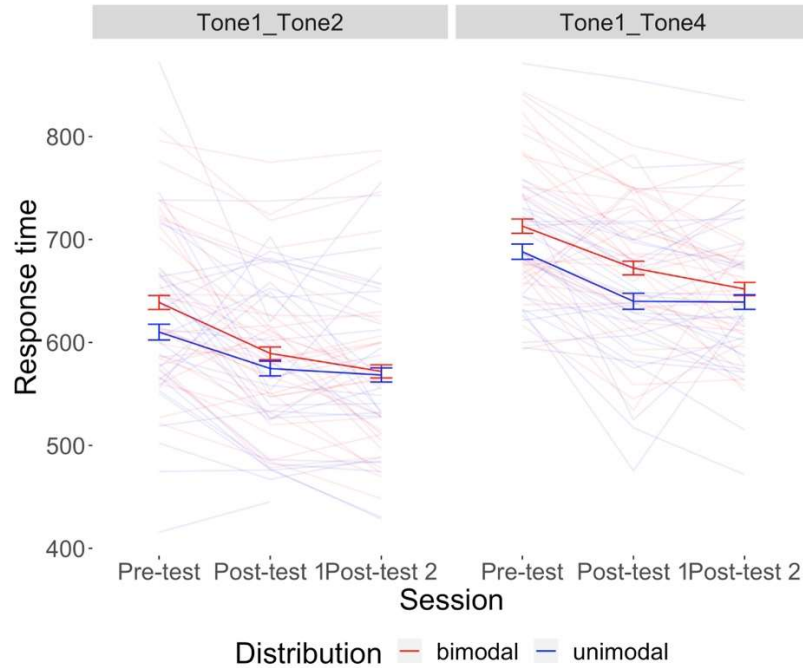

**Figure S1.** Reaction time in ABX discrimination task by distribution and by session; the error bars represent 1 SE above/below the mean. Individual data is plotted using faint lines for the unimodal group (blue) and the bimodal group (red).
